# Supplementary material for: Inhibition of Bruton’s tyrosine kinase with PD-1 blockade modulates T cell activation in solid tumors
Source: JCI journal article supplement (doi:10.1172/jci.insight.169927), 2024-11-07
Supplement: sd1 [file 1]

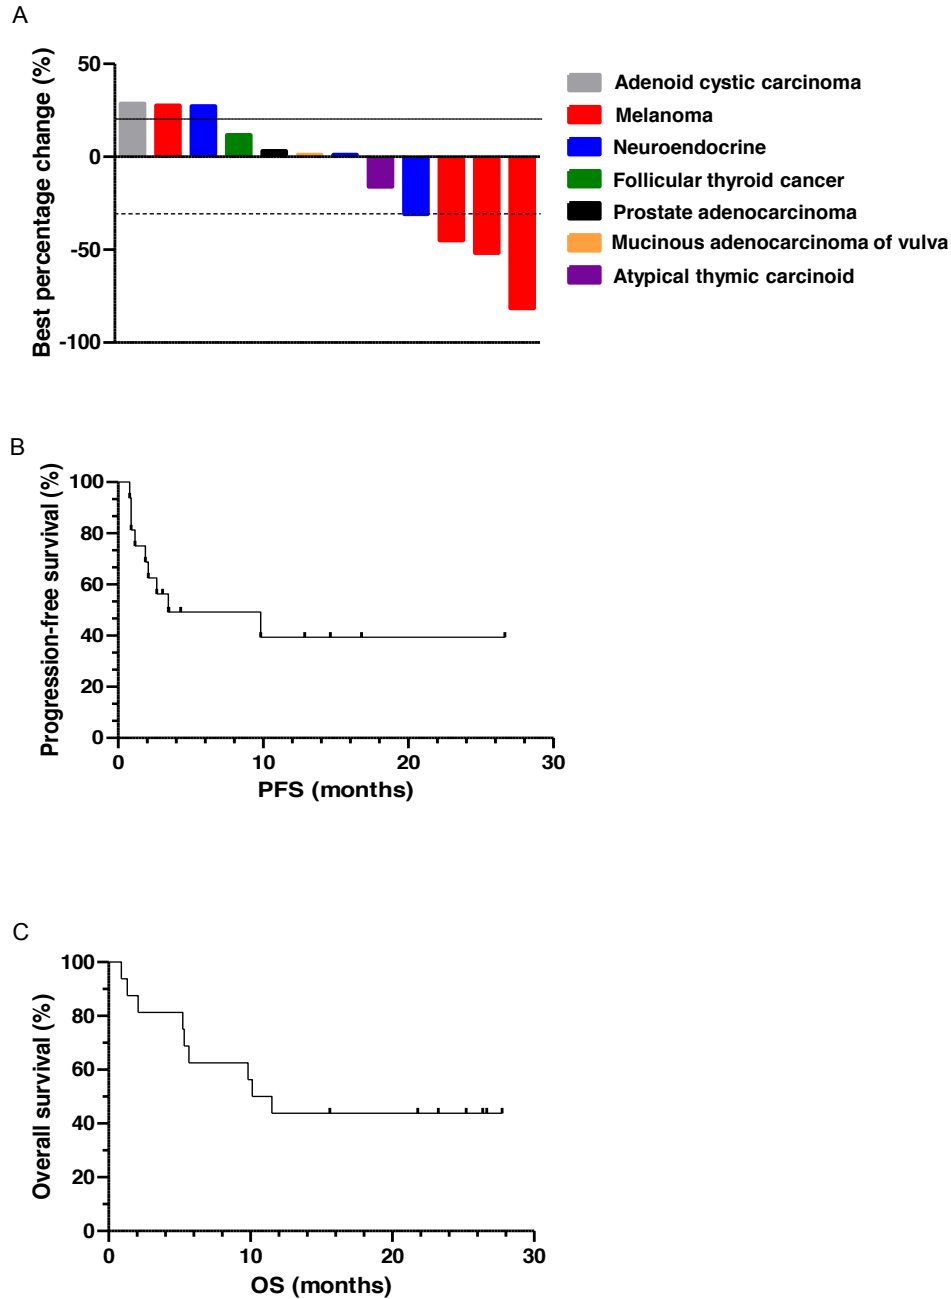

**Supplemental Figure 1. Exploratory analysis of clinical efficacy.** (A) Waterfall plot of best percent change from baseline for target lesions by RECIST v1.1 by tumor type (n=12 patients). Only patients with both baseline and post-baseline tumor assessments were included in this analysis. Kaplan-Meier curves for (B) progression-free survival (PFS) and (C) overall survival (OS).

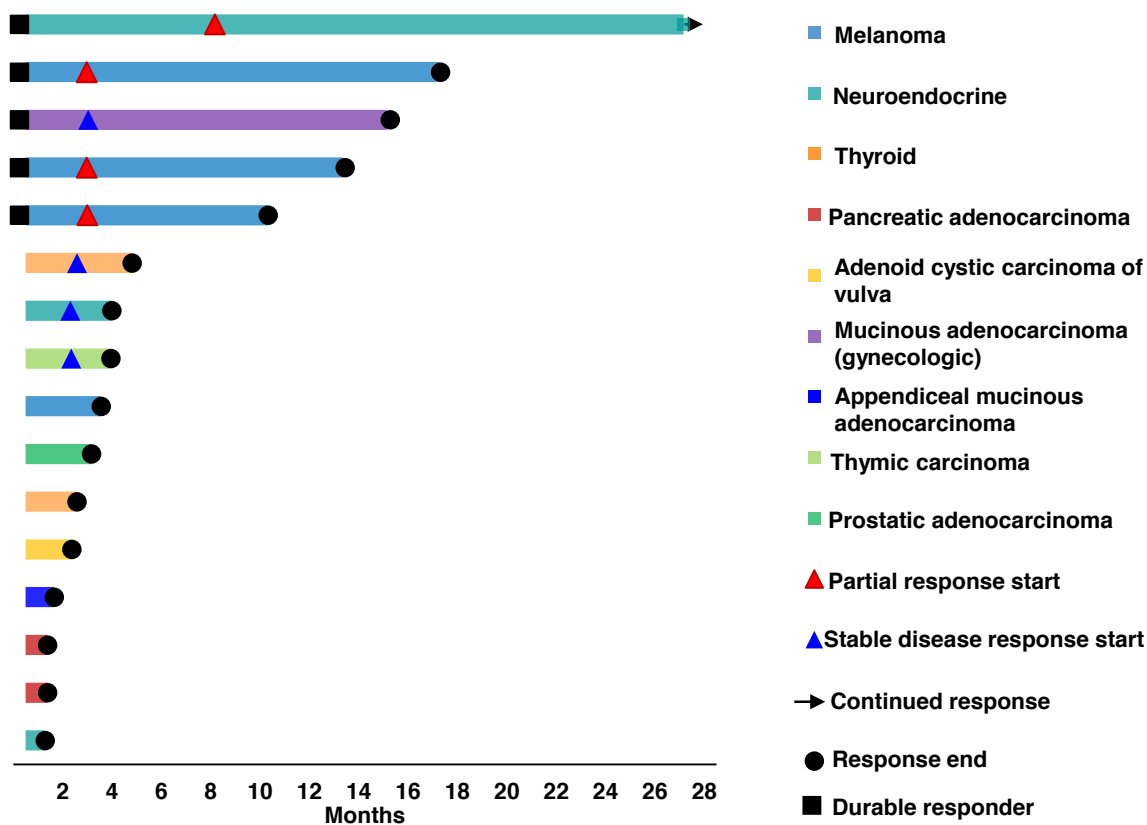

**Supplemental Figure 2. Swimmer plot of tumor types and best overall responses.** The onset and duration of partial response, stable disease, response end, the continuation of response and durable responder are indicated with specific symbols. A durable response is defined as any patient with a response of > 6 months. Patients are colored by tumor type.

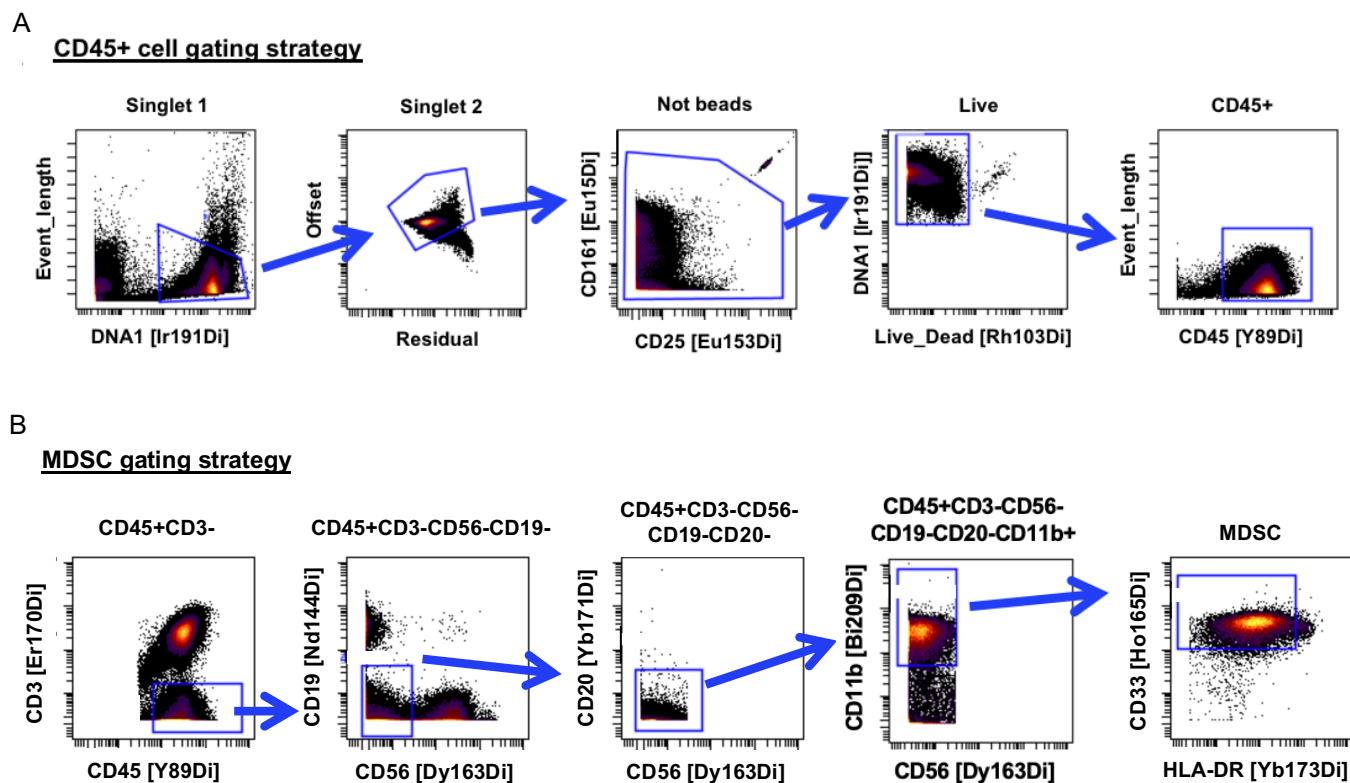

**Supplemental Figure 3. MDSC gating strategy.** (A) Mass cytometry gating strategy for isolation of live CD45<sup>+</sup> cells from PBMC and (B) MDSC gating strategy from CD45<sup>+</sup> cells.

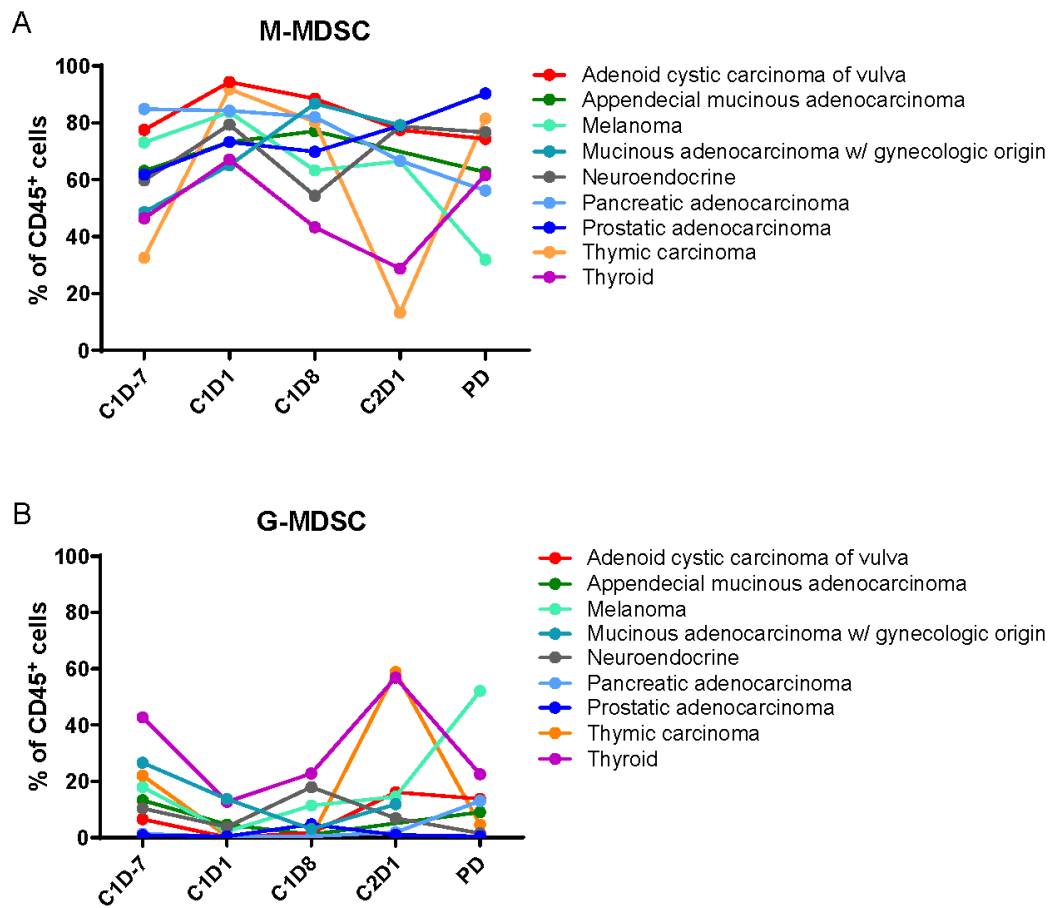

**Supplemental Figure 4. MDSC subset levels according to tumor type.** Subsets of MDSC, monocytic (M)-MDSC and granulocytic (G)-MDSC represented by tumor type.



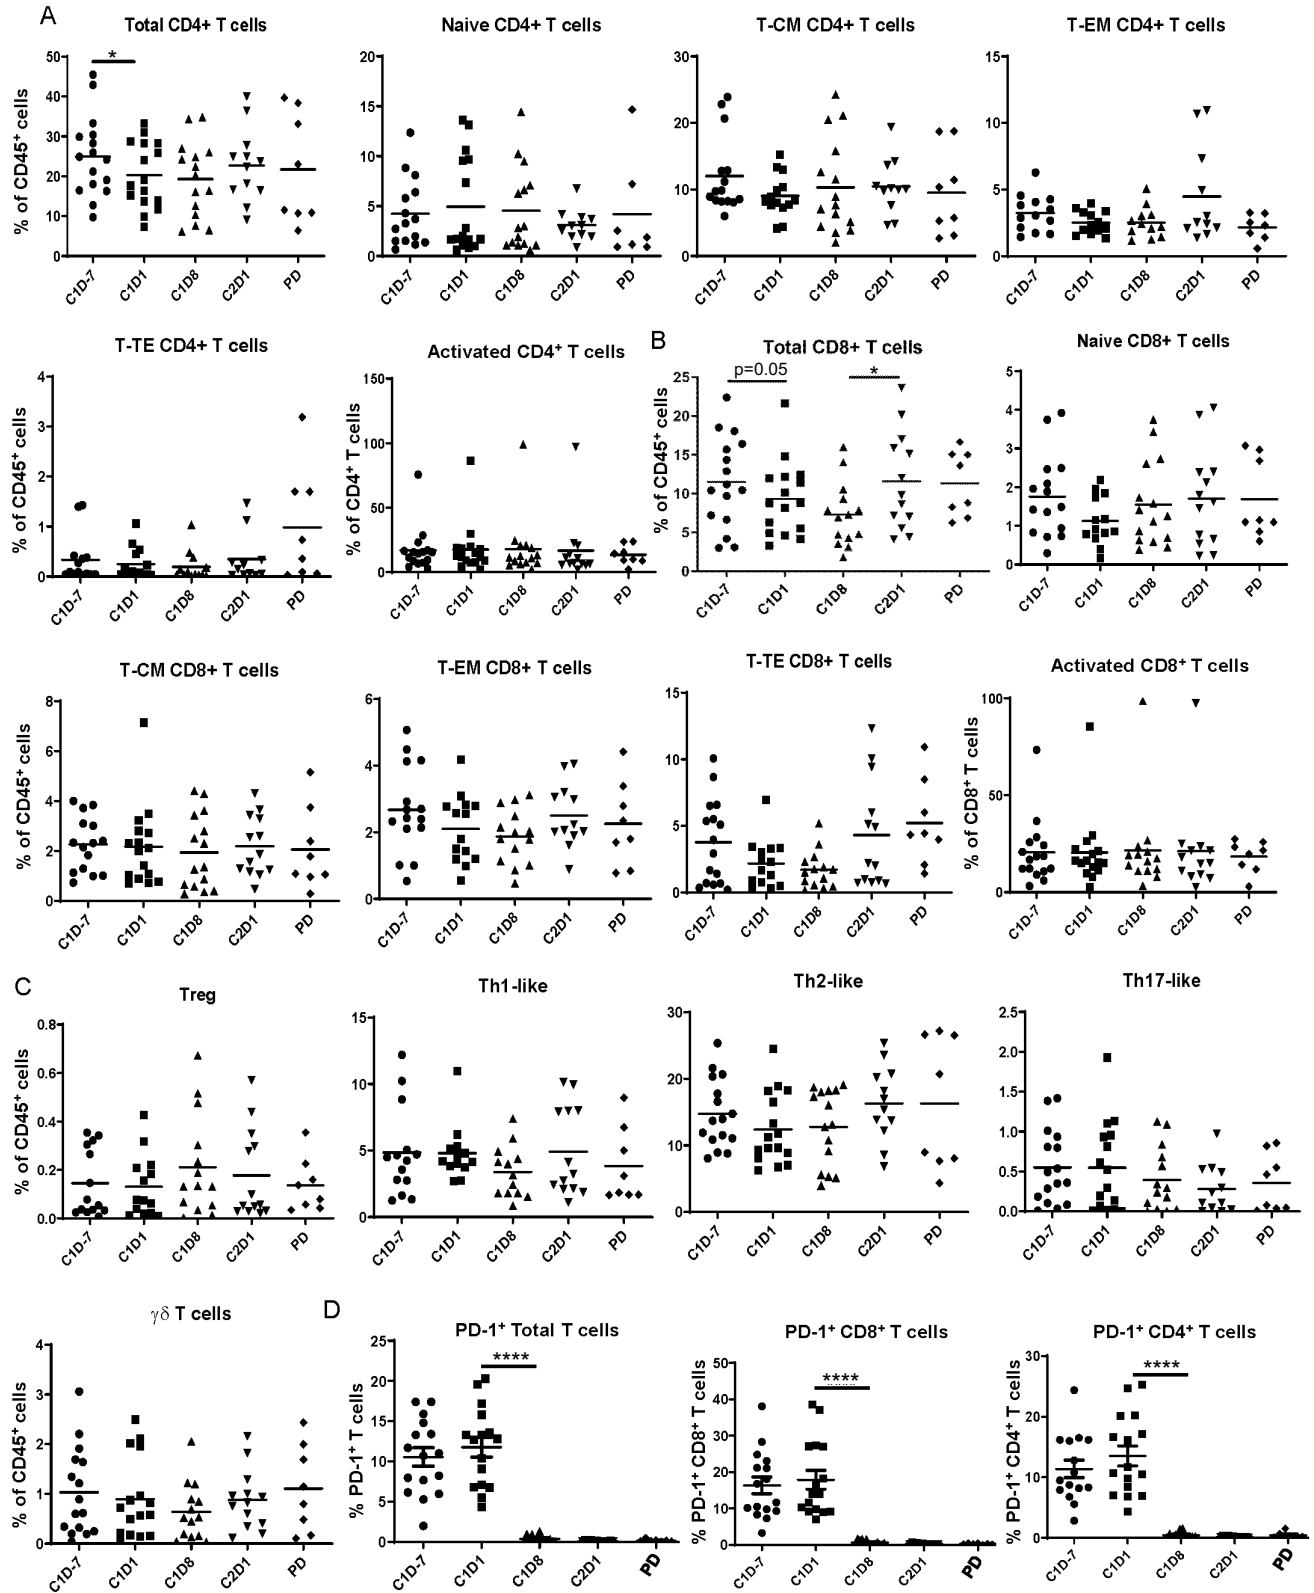

**Supplemental Figure 5. Effect of ibrutinib and nivolumab on T cells.** (A) Percentages of CD4<sup>+</sup> and (B) CD8<sup>+</sup> T cells isolated from the peripheral blood of patients (n=16) at the indicated timepoints and at time of disease progression (PD). T cells were differentiated into subsets based

on the expression of CD45RA and CCR7; Naïve T cells (CD45RA<sup>+</sup> CCR7<sup>+</sup>), central memory T cells (CD45RA<sup>-</sup> CCR7<sup>+</sup>), effector memory T cells (CD45RA<sup>-</sup> CCR7<sup>-</sup>), terminal effector memory T cells (CD45RA<sup>+</sup> CCR7<sup>-</sup>) and activated T cells (CD69<sup>+</sup>). (C) Percentages of regulatory T cells (Treg), Th1, Th2, Th17, and  $\gamma\delta$  T cell subsets. (D) Percentages of PD-1<sup>+</sup> total, CD8<sup>+</sup> and CD4<sup>+</sup> T cells. Cell population data was obtained using mass cytometry. Data represent mean  $\pm$  SEM. Data are analyzed by student's *t*-test (paired), and p-values are adjusted for multiple comparisons using Holm-Bonferroni method, \**p*<0.05, \*\**p*<0.01, \*\*\**p*<0.001, \*\*\*\**p*<0.0001.

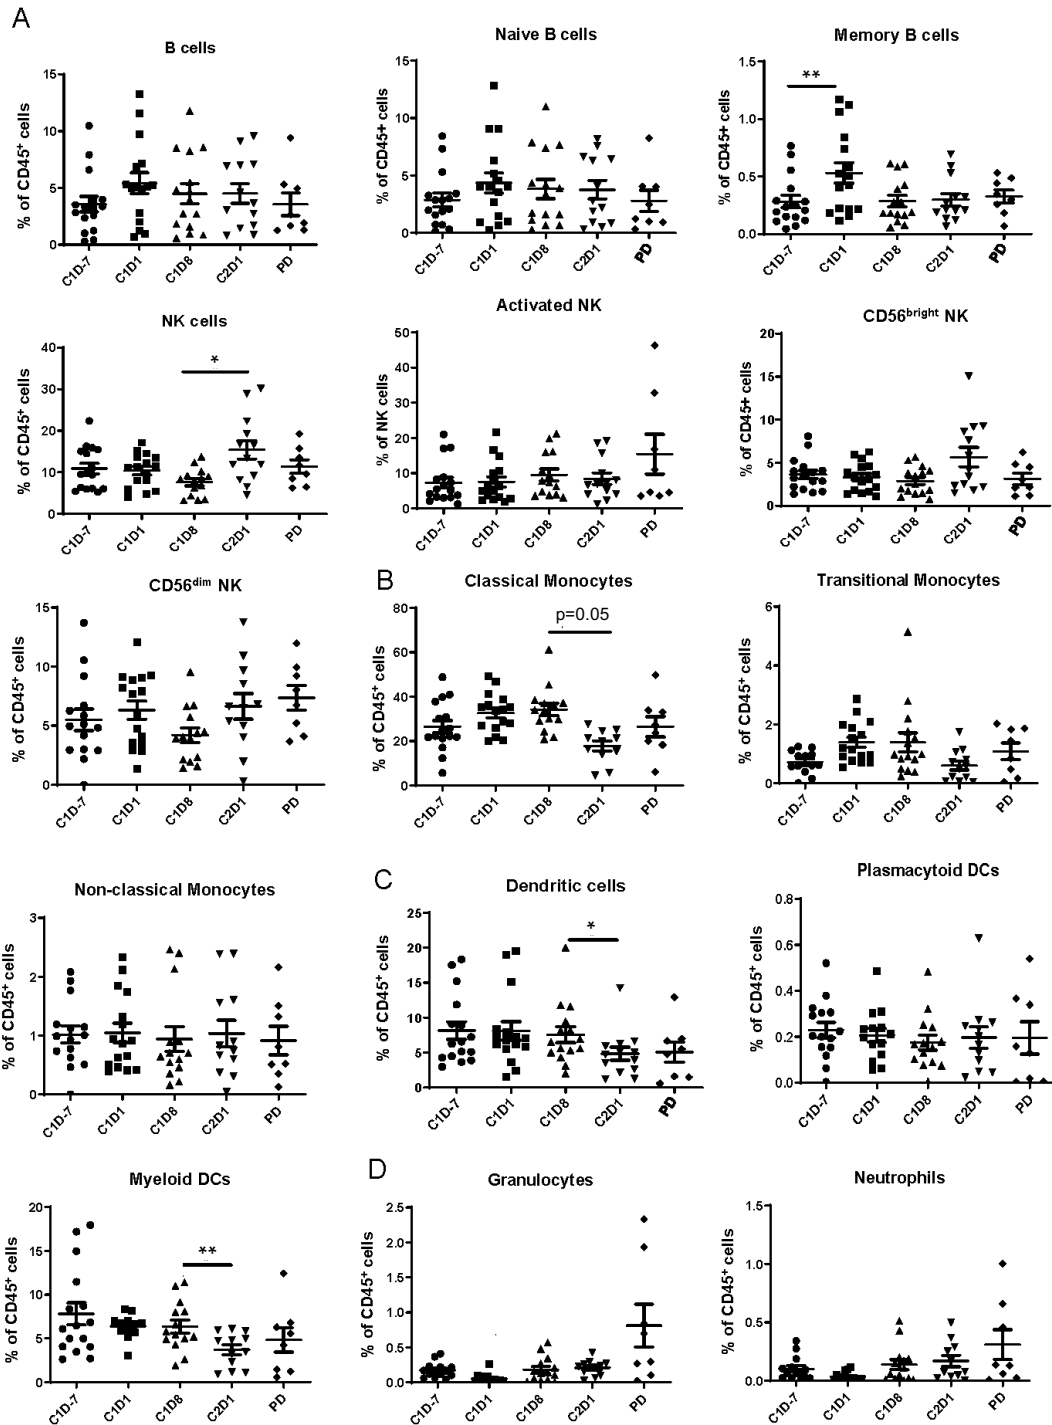

**Supplemental Figure 6. Effect of ibrutinib and nivolumab on circulating immune cell subsets.** Cell population data obtained using mass cytometry. Percentages of (A) total, naïve and memory B cells, total, activated (CD69<sup>+</sup>), CD56<sup>bright</sup> and CD56<sup>dim</sup> NK cells, (B) classical, transitional, and non-classical monocytes, (C) dendritic cells (DCs), plasmacytoid DCs, and myeloid DCs, (D) granulocytes and neutrophils isolated from the peripheral blood of patients at the indicated timepoints and at disease progression (PD). Data represent mean  $\pm$  SEM (n=16 patients). Data are analyzed by student's *t*-test (paired), and p-values are adjusted for multiple comparisons using Holm-Bonferroni method, \*p<0.05, \*\*p<0.01.

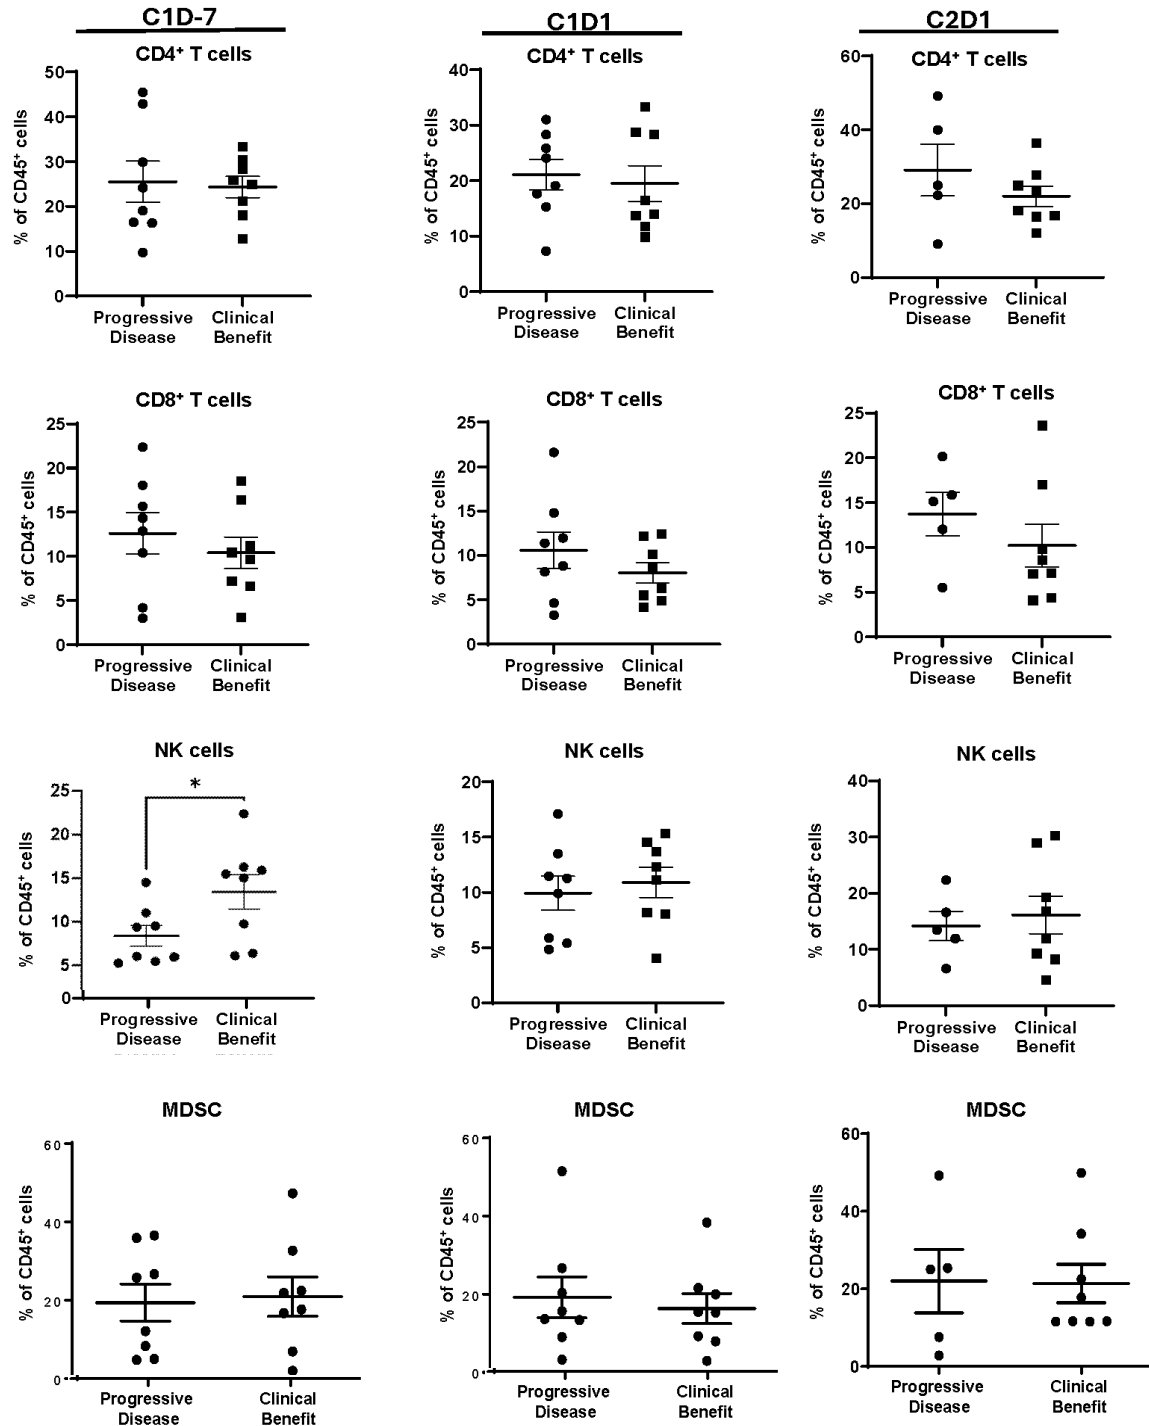

**Supplemental Figure 7. Comparison of circulating immune cell populations between progressive disease and clinically benefitting patients.** Quantification of major immune cell populations isolated from the peripheral blood of study patients at the indicated timepoints. Cell population data was obtained using mass cytometry. Data are presented as mean normalized intensity  $\pm$  SE (n=16 patients). Clinical benefit included PR=partial response (n=4) and SD=stable disease (n=4). PD = progressive disease (n=8). Student's *t*-tests (un-paired) were used to compare clinical benefit (PR+SD) and PD at each timepoint for each cell type respectively, \**p*<0.05.

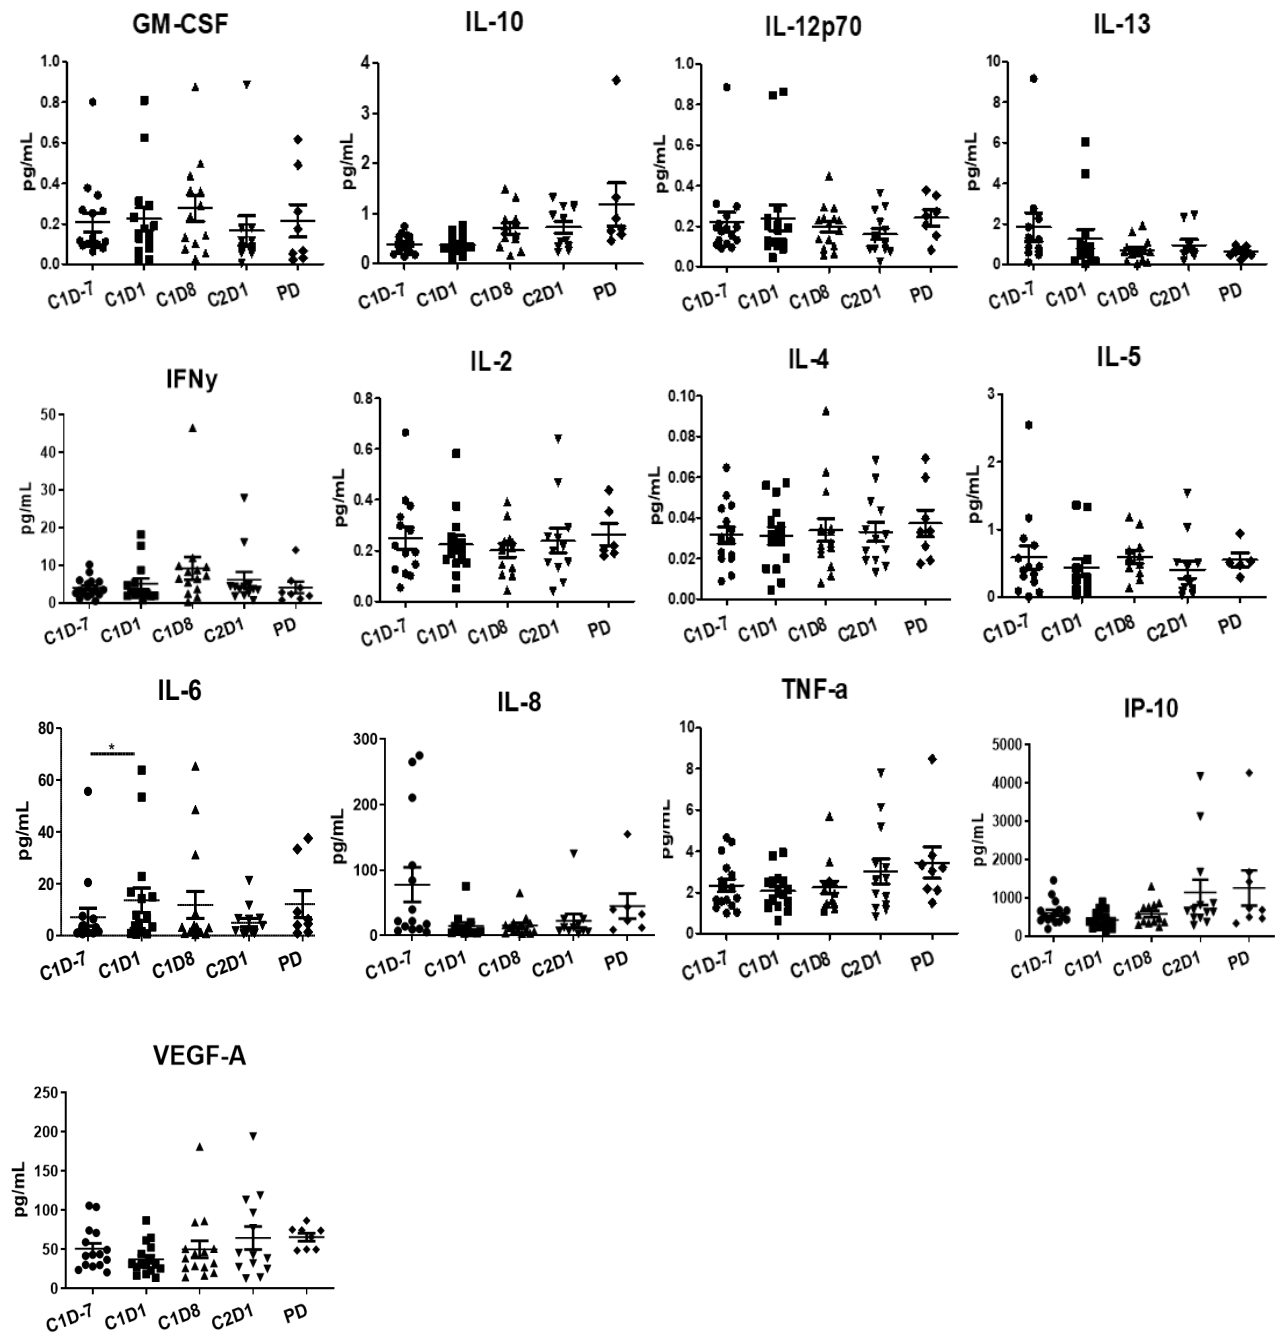

**Supplemental Figure 8. Serum levels of cytokines vary over the course of study therapy.** Serum levels of GM-CSF, IL-10, IL-12p70, IL-13, IFN- $\gamma$ , IL-2, IL-4, IL-5, IL-6, IL-8, TNF- $\alpha$ , IP-10 and VEGF-A were measured prior to cycle 1 day -7 (baseline), cycle 1 day 1, cycle 1 day 8, cycle 2 day 1 and at the time of disease progression (PD) using a custom U-PLEX Human Cytokine Panel 20-plex Assay. The assay was performed in duplicate and cytokine levels were measured for all patients and displayed as mean  $\pm$  SEM. Data are analyzed by student's *t*-test (paired), and *p*-values are adjusted for multiple comparisons within each biomarker using Holm-Bonferroni method, \**p*<0.05.

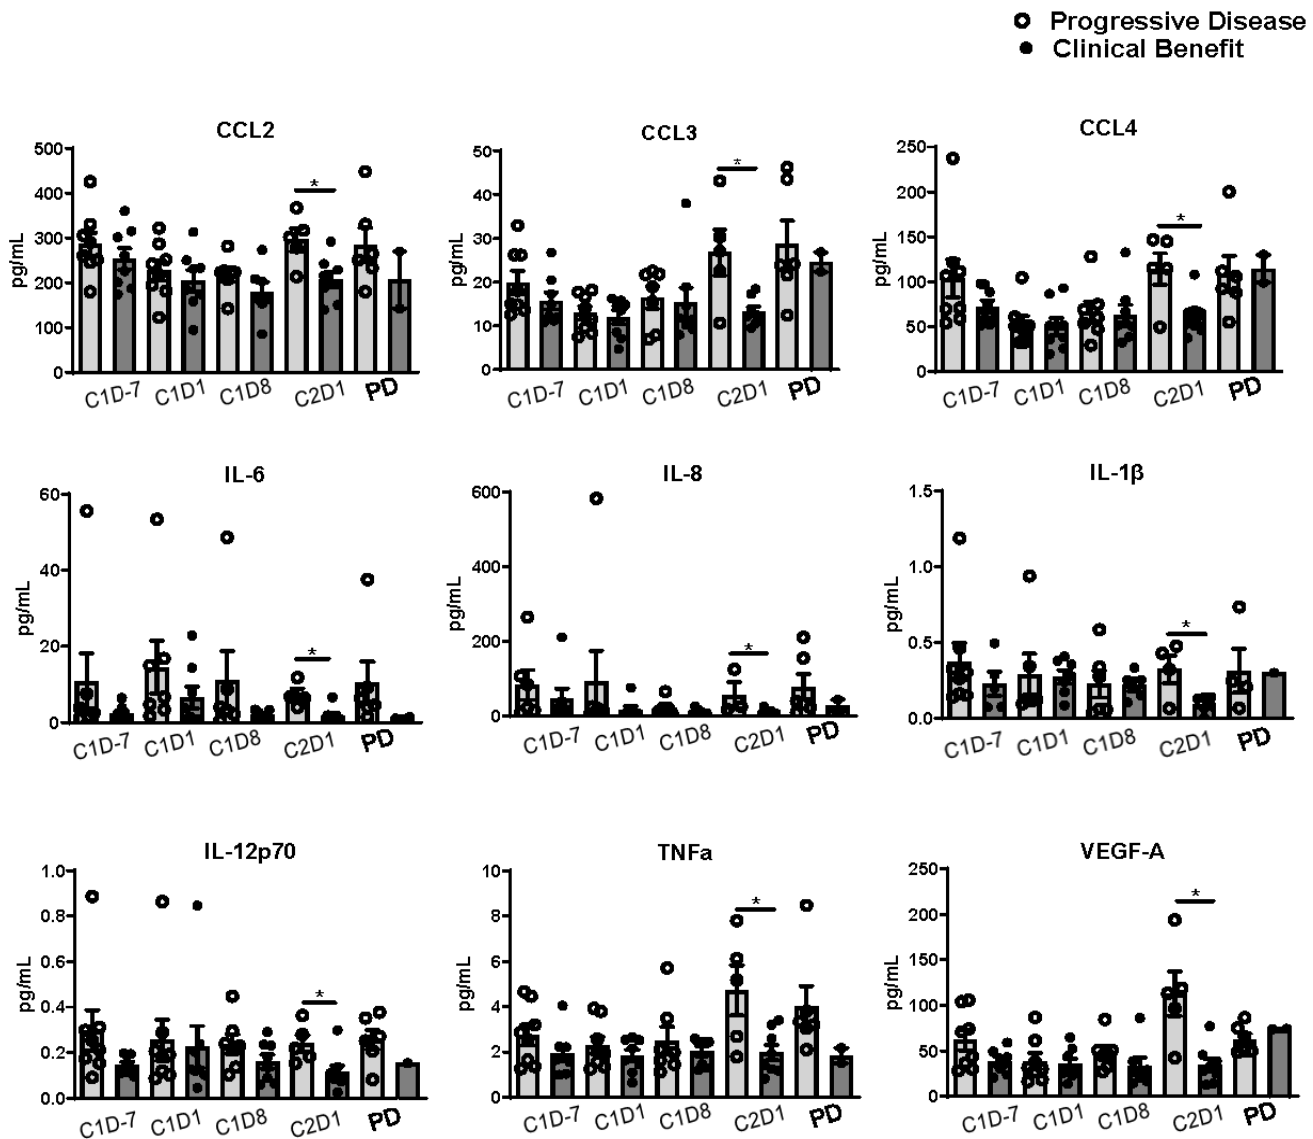

**Supplemental Figure 9. Serum levels of CCL2, CCL3, CCL4, IL-6, IL-8, IL-1 $\beta$ , IL-12p70, TNF $\alpha$  and VEGF-A vary by response.** Serum levels of 20 cytokines and chemokines were measured at the indicated timepoints and at time of disease progression (PD). Patients were grouped as clinical benefit (partial response and stable disease) or progressive disease. Levels of CCL2, CCL3, CCL4, IL-6, IL-8, IL-1 $\beta$ , IL-12p70, TNF $\alpha$  and VEGF-A at cycle 2, day 1 (C2D1) were significantly decreased in clinically benefitting patients compared to progressive disease. Student's *t*-tests (un-paired) were used to compare clinical benefit (PR+SD) and PD at each timepoint for each cytokine respectively, \**p*<0.05.

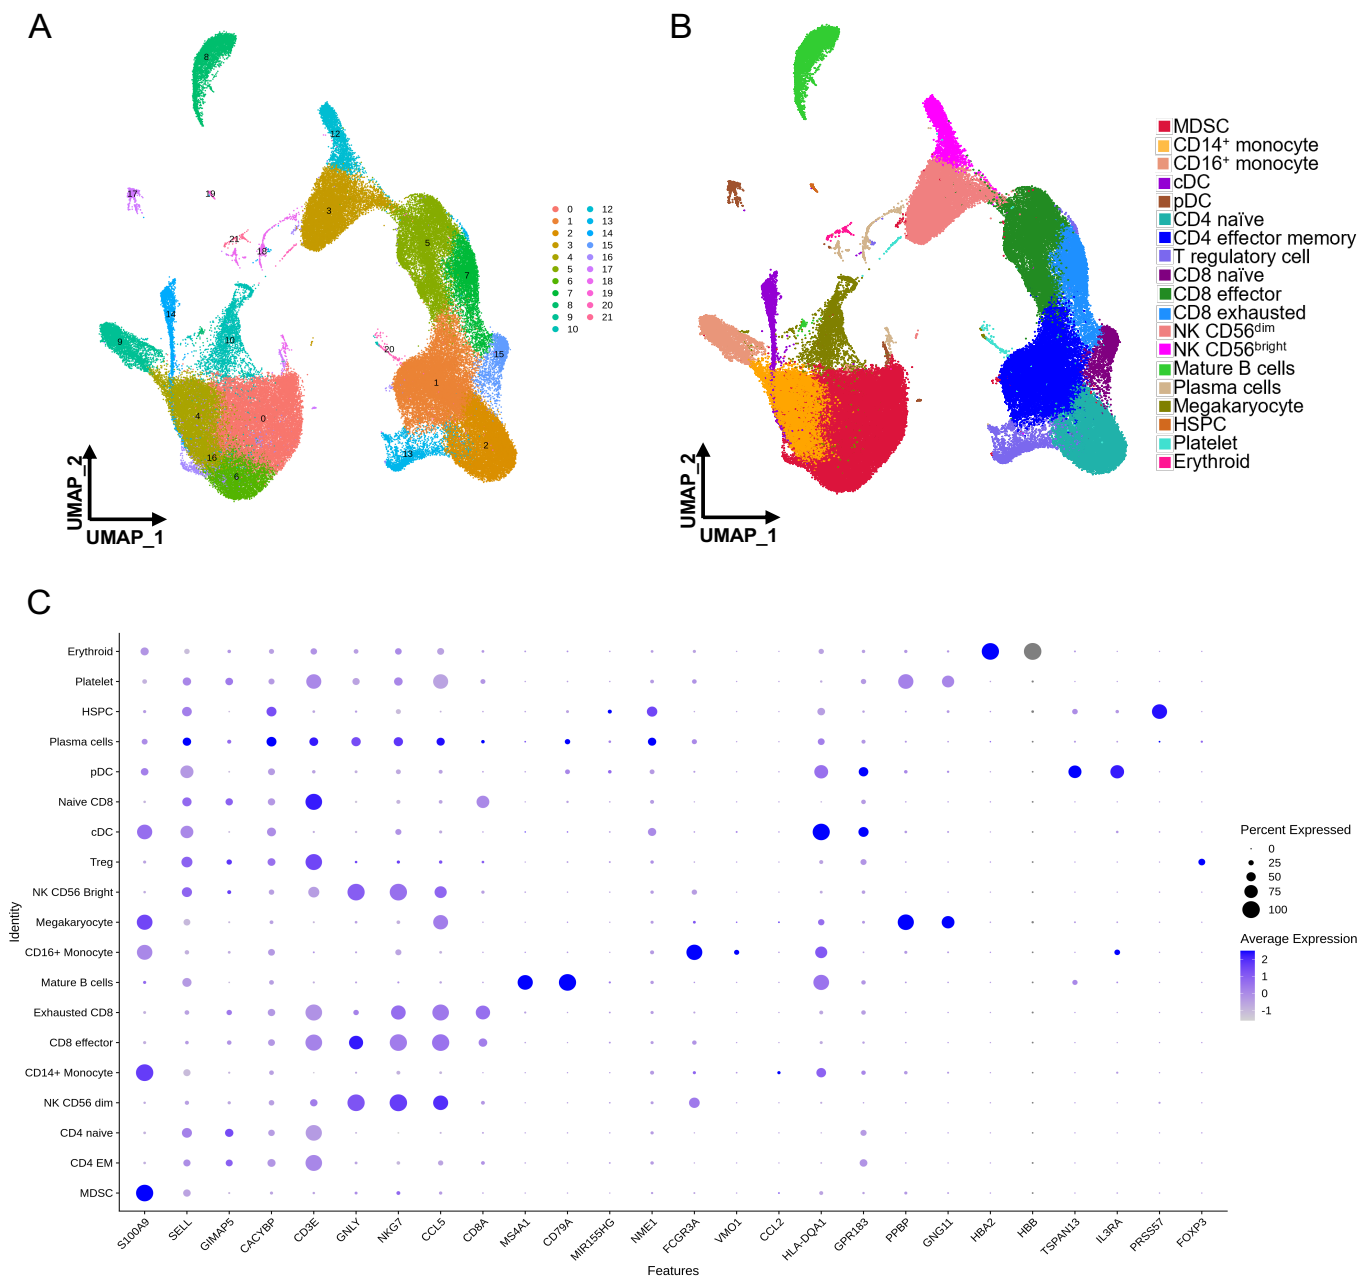

**Supplemental Figure 10. Louvain clustering and subcluster identification.** (A) Louvain clustering of single-cell RNA-sequencing data from patients (n=16) at C1D-7 and C1D1 (n=30 samples). Individual clusters identified by expression of canonical gene markers are labeled as 0-21. (B) Annotated clusters generated using SingleR and manually using PanglaoDB (66). (C) Heatmap of canonical gene markers used to verify cluster annotation. Circle sizes are proportional to the percent expression of each marker. Circle color represents the average expression of each marker with a darker color corresponding to a higher expression level.

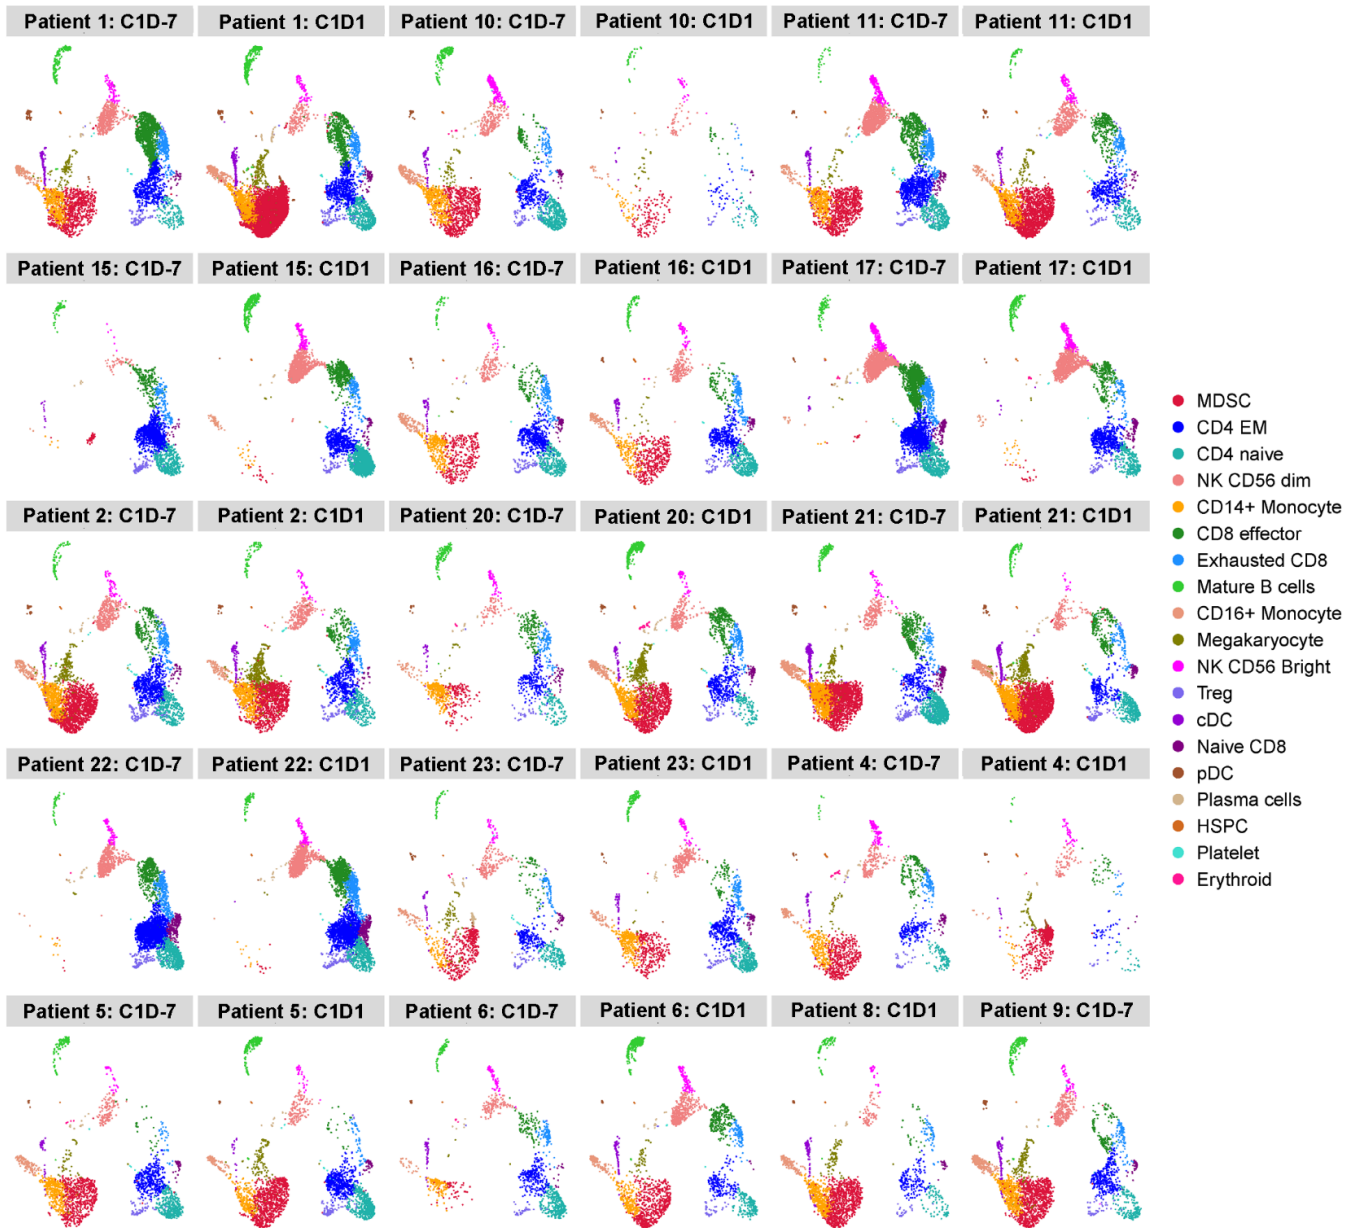

**Supplemental Figure 11. Individual patient UMAPs.** UMAPs for each patient (n=16) before (C1D-7) and/or after 7 days of ibrutinib therapy (C1D1).



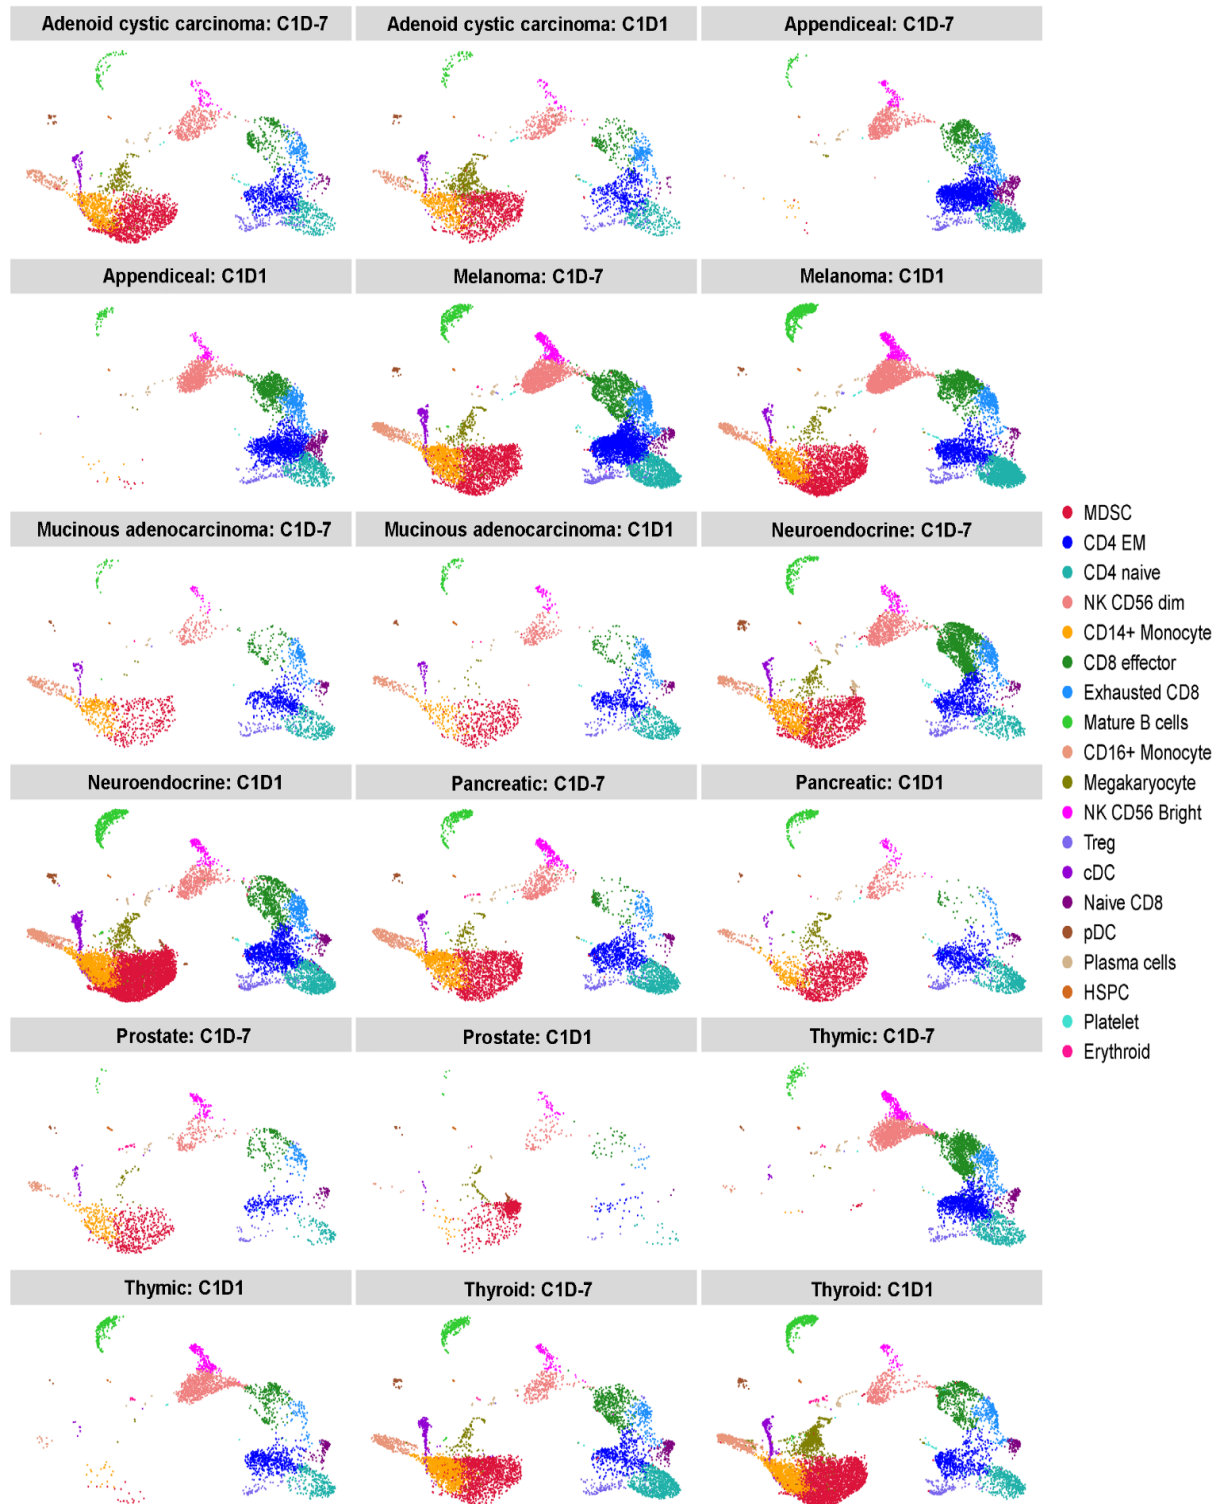

**Supplemental Figure 12. Tumor type specific UMAPs.** Individual UMAPs for each tumor type including (adenoid cystic carcinoma: n=1, appendiceal: n=1, melanoma: n=4, mucinous adenocarcinoma: n=1, neuroendocrine: n=3, pancreatic: n=2, prostate: n=1, thymic: n=1, thyroid: n=2) before (C1D-7) and after 7 days of ibrutinib therapy (C1D1).

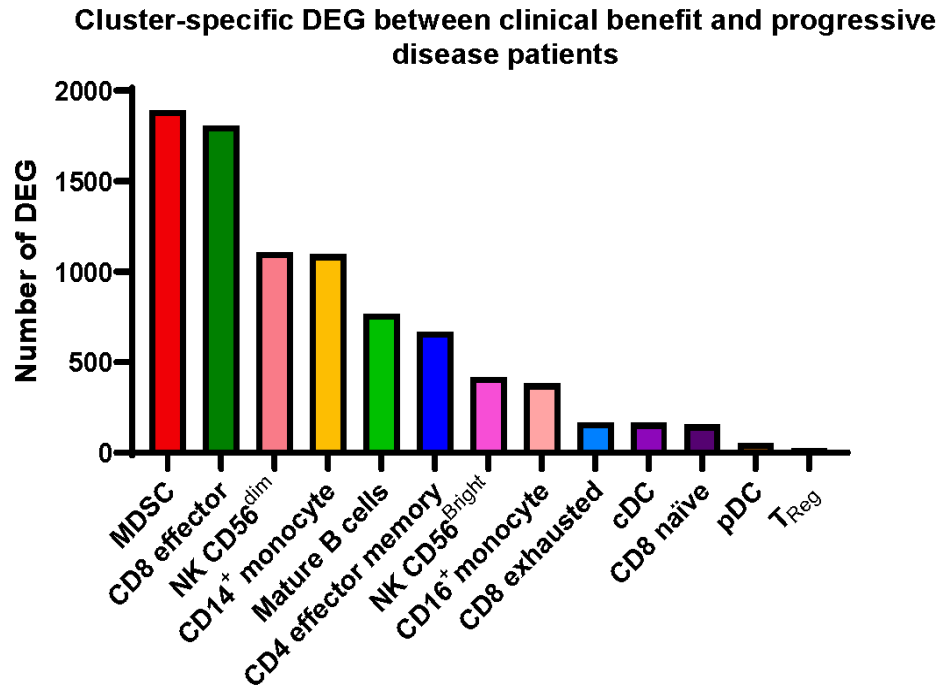

**Supplemental Figure 13. Analysis of cluster-specific differentially expressed genes between patient response groups.** Gene expression data was calculated based on paired C1D-7 and C1D1 single-cell RNA-seq samples from patients classified as clinical benefit (partial response or stable disease) (n=6 patients, n=12 samples) and patients classified as having progressive disease (n=8 patients, n=16 samples). The number of genes differentially expressed between patients with clinical benefit and patients with progressive disease within individual immune cell clusters were then calculated.

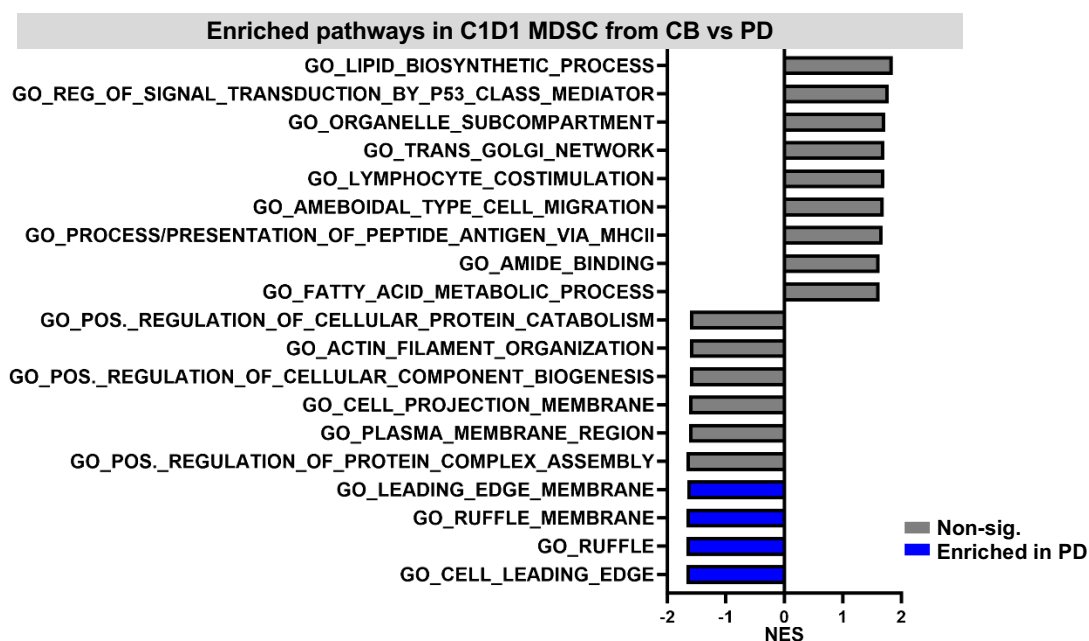

**Supplemental Figure 14. Pathway enrichment analysis of ibrutinib-treated MDSC from patients with clinical benefit vs patients with progressive disease.** Pathway analysis of the top differentially expressed genes (DEG) in the C1D1 MDSC population in patients with clinical benefit (CB) versus patients with progressive disease (PD). Enrichment is displayed as a normalized enrichment score (NES). Pathways with a Bonferroni-corrected p-value < 0.05 were considered significantly enriched. Pathways significantly enriched in PD patients compared to CB patients are shown in blue. Non-significantly enriched pathways are shown in gray.

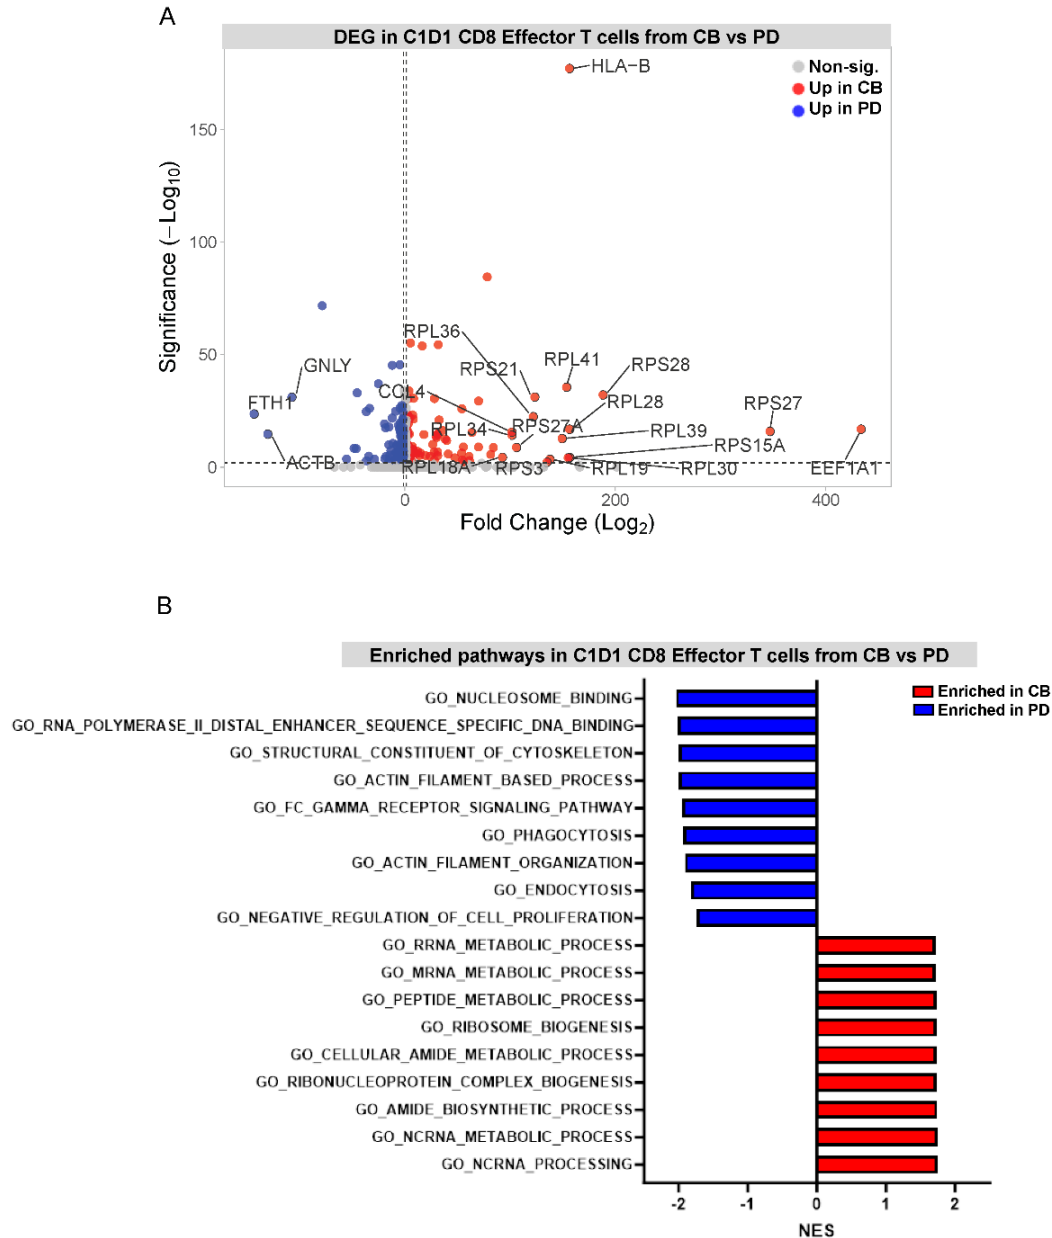

**Supplemental Figure 15. Gene expression and pathway enrichment differences in ibrutinib-treated CD8<sup>+</sup> effector T cells between patient response groups.** (A) Volcano plot of top differentially expressed genes after ibrutinib treatment (C1D1) in the CD8<sup>+</sup> effector T cell population from patients with clinical benefit (CB, n=6 patients) versus patients with progressive disease (PD, n=8 patients). Genes downregulated in CD8<sup>+</sup> effector T cells from clinical benefit patients relative to CD8<sup>+</sup> effector T cells from patients with progressive disease are represented in blue and genes upregulated in CD8<sup>+</sup> effector T cells from clinical benefit patients relative to progressive disease patients are represented in red. ( $x = \log_2$  fold change/  $y = -\log_{10}$ (Adjusted P value)). (B) Pathway analysis of the top differentially expressed genes in C1D1 CD8<sup>+</sup> effector T cells from patients with clinical benefit versus patients with progressive disease. Pathways significantly enriched in clinical benefit patients compared to progressive disease patients are shown in red and pathways significantly enriched in progressive disease patients compared to clinical benefit patients are shown in blue.

**Supplemental Table 1. Schedule of sample collection and study schema.**

|                             | C1D-7                                                                               | C1D1 | C1D8 | C1D15 | C2D1 | C3+ | Progressive Disease |
|-----------------------------|-------------------------------------------------------------------------------------|------|------|-------|------|-----|---------------------|
| Ibrutinib                   | X  |      |      |       |      |     |                     |
| Nivolumab                   |                                                                                     | X    |      | X     | X    | X   |                     |
| Peripheral blood collection | X                                                                                   | X    | X    |       | X    |     | X                   |

**Supplemental Table 2. Demographics and patient characteristics (n=16).**

|                                                       | Total (N=16) |
|-------------------------------------------------------|--------------|
| <b>Age (years)</b>                                    |              |
| Mean                                                  | 60.3         |
| Median                                                | 60.5         |
| Min, Max                                              | 31, 81       |
| SD                                                    | 13.48        |
| <b>Gender, <i>n</i> (%)</b>                           |              |
| Male                                                  | 9 (56)       |
| Female                                                | 7 (44)       |
| <b>Race, <i>n</i> (%)</b>                             |              |
| White                                                 | 14 (88)      |
| African American                                      | 1 (6)        |
| Unknown/declined                                      | 1 (6)        |
| <b>Primary Malignancy, <i>n</i> (%)</b>               |              |
| Adenoid cystic carcinoma of vulva                     | 1 (6)        |
| Appendiceal mucinous adenocarcinoma                   | 1 (6)        |
| Melanoma                                              | 4 (25)       |
| Mucinous adenocarcinoma with gynecologic origin       | 1 (6)        |
| Neuroendocrine                                        | 3 (19)       |
| Pancreatic adenocarcinoma                             | 2 (13)       |
| Prostatic adenocarcinoma                              | 1 (6)        |
| Thymic carcinoma                                      | 1 (6)        |
| Thyroid                                               |              |
| Anaplastic                                            | 1 (6)        |
| Follicular                                            | 1 (6)        |
| <b>ECOG PS, <i>n</i> (%)</b>                          |              |
| 0                                                     | 8 (50)       |
| 1                                                     | 7 (44)       |
| 2                                                     | 1 (6)        |
| <b>Prior Systemic Therapy, <i>n</i> (%)</b>           |              |
| Yes                                                   | 12 (75)      |
| No                                                    | 4 (25)       |
| <b>Number of Prior Lines of Therapy, <i>n</i> (%)</b> |              |
| 0                                                     | 5 (31)       |
| 1                                                     | 4 (25)       |
| 2                                                     | 0 (0)        |
| 3                                                     | 3 (19)       |
| >3                                                    | 4 (25)       |
| <b>Prior Checkpoint Therapy, <i>n</i> (%)</b>         |              |
| Yes                                                   | 0            |
| No                                                    | 16 (100)     |

ECOG PS = Eastern Cooperative Oncology Group performance status

**Supplemental Table 3. Summary of adverse events associated with ibrutinib and nivolumab combination therapy.**

| <b>ADVERSE EVENTS</b>                                | <b>Grade 1-2 N (%)</b> | <b>Grade 3 N (%)</b> | <b>Total (N=16)</b> |
|------------------------------------------------------|------------------------|----------------------|---------------------|
| <b>Blood and lymphatic system disorders</b>          |                        |                      |                     |
| Anemia                                               | -                      | 2 (12.5)             | 2 (12.5)            |
| Thrombocytopenia                                     | 1 (6.25)               | -                    | 1 (6.25)            |
| <b>Cardiac disorders</b>                             |                        |                      |                     |
| Atrial fibrillation                                  | 1 (6.25)               | -                    | 1 (6.25)            |
| Palpitations                                         | 1 (6.25)               | -                    | 1 (6.25)            |
| Sinus bradycardia                                    | 1 (6.25)               | -                    | 1 (6.25)            |
| <b>Gastrointestinal disorders</b>                    |                        |                      |                     |
| Aspartate aminotransferase increased                 | 1 (6.25)               | -                    | 1 (6.25)            |
| Blood bilirubin increased                            | 1 (6.25)               | -                    | 1 (6.25)            |
| Diarrhea                                             | 1 (6.25)               | -                    | 1 (6.25)            |
| Nausea                                               | 2 (12.5)               | 1 (6.25)             | 3 (19)              |
| Oral mucositis                                       | 2 (12.5)               | -                    | 2 (12.5)            |
| Vomiting                                             | 3 (19)                 | -                    | 3 (19)              |
| <b>General, metabolic, and psychiatric disorders</b> |                        |                      |                     |
| Agitation                                            | 1 (6.25)               | -                    | 1 (6.25)            |
| Anorexia                                             | 5 (31)                 | -                    | 5 (31)              |
| Fatigue                                              | 5 (31)                 | -                    | 5 (31)              |
| Fever                                                | 1 (6.25)               | -                    | 1 (6.25)            |
| Hyperglycemia                                        | 1 (6.25)               | -                    | 1 (6.25)            |
| Hypokalemia                                          | 1 (6.25)               | -                    | 1 (6.25)            |
| Insomnia                                             | 1 (6.25)               | -                    | 1 (6.25)            |
| <b>Renal disorders</b>                               |                        |                      |                     |
| Creatinine increased                                 | 1 (6.25)               | -                    | 1 (6.25)            |
| <b>Respiratory disorders</b>                         |                        |                      |                     |
| Dyspnea                                              | 1 (6.25)               | -                    | 1 (6.25)            |
| Hemoptysis                                           | 1 (6.25)               | -                    | 1 (6.25)            |
| Lung infection                                       | -                      | 1 (6.25)             | 1 (6.25)            |
| Pleural Effusion                                     | 1 (6.25)               | -                    | 1 (6.25)            |
| <b>Skin and musculoskeletal disorders</b>            |                        |                      |                     |
| Maculo-papular rash                                  | 2 (12.5)               | 2 (12.5)             | 4 (25)              |
| Myalgia                                              | 2 (12.5)               | -                    | 2 (12.5)            |
| Non-specific skin disorders                          | 3 (19)                 | -                    | 3 (19)              |
| Papulo-pustular rash                                 | 1 (6.25)               | -                    | 1 (6.25)            |
| Pruritus                                             | 2 (12.5)               | -                    | 2 (12.5)            |

**Supplemental Table 4. Summary of best overall tumor response.**

| Best Overall Response, n (%) | Total (N=16) |
|------------------------------|--------------|
| Complete Response            | 0            |
| Partial Response             | 4 (25%)      |
| Stable Disease               | 4 (25%)      |
| Progressive Disease          | 8 (50%)      |



**Supplemental Table 5. Maxpar direct immune profiling assay 37-marker panel with clones and heavy metals.**

| CyTOF Profiling Panel  |          |       |          |
|------------------------|----------|-------|----------|
| Target                 | Clone    | Metal | Source   |
| CD45                   | HI30     | 89Y   | Fluidigm |
| CD196/CCR6             | G034E3   | 141Pr | Fluidigm |
| CD15                   | W6D3     | 142Nd | Fluidigm |
| CD123                  | 6H6      | 143Nd | Fluidigm |
| CD19                   | HIB19    | 144Nd | Fluidigm |
| CD4                    | RPA-T4   | 145Nd | Fluidigm |
| CD8a                   | RPA-T8   | 146Nd | Fluidigm |
| CD11c                  | Bu15     | 147Sm | Fluidigm |
| CD16                   | 3G8      | 148Nd | Fluidigm |
| CD45RO                 | UCHL1    | 149Sm | Fluidigm |
| CD45RA                 | HI100    | 150Nd | Fluidigm |
| CD161                  | HP-3G10  | 151Eu | Fluidigm |
| CD194/CCR4             | L291H4   | 152Sm | Fluidigm |
| CD25                   | BC96     | 153Eu | Fluidigm |
| CD27                   | O323     | 154Sm | Fluidigm |
| CD57                   | HCD57    | 155Gd | Fluidigm |
| CD183/CXCR3            | G025H7   | 156Gd | Fluidigm |
| CD185/CXCR5            | J252D4   | 158Gd | Fluidigm |
| CD69                   | FN50     | 159Tb | Fluidigm |
| CD28                   | CD28.2   | 160Gd | Fluidigm |
| CD38                   | HB-7     | 161Dy | Fluidigm |
| CD73                   | AD2      | 162Dy | Fluidigm |
| CD56/NCAM              | NCAM16.2 | 163Dy | Fluidigm |
| TCRgd                  | B1       | 164Dy | Fluidigm |
| CD33                   | WM53     | 165Ho | Fluidigm |
| CD294                  | BM16     | 166Er | Fluidigm |
| CD197/CCR7             | G043H7   | 167Er | Fluidigm |
| CD14                   | 63D3     | 168Er | Fluidigm |
| CD39                   | A1       | 169Tm | Fluidigm |
| CD3                    | UCHT1    | 170Er | Fluidigm |
| CD20                   | 2H7      | 171Yb | Fluidigm |
| CD66b                  | G10F5    | 172Yb | Fluidigm |
| HLA-DR                 | LN3      | 173Yb | Fluidigm |
| IgD                    | IA6-2    | 174Yb | Fluidigm |
| CD279/PD-1             | EH12.2H7 | 175Lu | Fluidigm |
| CD127                  | A019D5   | 176Yb | Fluidigm |
| CD11b                  | ICRF44   | 209Bi | Fluidigm |
| Live/dead intercalator | N/A      | 103Rh | Fluidigm |

**Supplemental Table 6. Immune cell populations and model definitions.**

| Index | Populations               | Model phenotypes                                                         |
|-------|---------------------------|--------------------------------------------------------------------------|
| 1     | Lymphocytes               | CD45+                                                                    |
| 2     | CD3 T cells               | CD45+ CD3+ CD14- CD66b- CD20- CD56-                                      |
| 3     | CD8 T cells               | CD45+ CD3+ CD14- CD66b- CD20- CD56- TCRgd- CD4- CD8+                     |
| 4     | CD8 naïve                 | CD45+ CD3+ CD14- CD66b- CD20- CD56- TCRgd- CD4- CD8+ CCR7+ CD45RA+       |
| 5     | CD8 central memory        | CD45+ CD3+ CD14- CD66b- CD20- CD56- TCRgd- CD4- CD8+ CCR7+ CD45RA-       |
| 6     | CD8 effector memory       | CD45+ CD3+ CD14- CD66b- CD20- CD56- TCRgd- CD4- CD8+ CCR7- CD45RA-       |
| 7     | CD8 terminal effector     | CD45+ CD3+ CD14- CD66b- CD20- CD56- TCRgd- CD4- CD8+ CCR7- CD45RA+       |
| 8     | CD4 T cells               | CD45+ CD3+ CD14- CD66b- CD20- CD56- TCRgd- CD4+ CD8-                     |
| 9     | CD4 naïve                 | CD45+ CD3+ CD14- CD66b- CD20- CD56- TCRgd- CD4+ CD8- CCR7+ CD45RA+       |
| 10    | CD4 central memory        | CD45+ CD3+ CD14- CD66b- CD20- CD56- TCRgd- CD4+ CD8- CCR7+ CD45RA-       |
| 11    | CD4 effector memory       | CD45+ CD3+ CD14- CD66b- CD20- CD56- TCRgd- CD4+ CD8- CCR7- CD45RA-       |
| 12    | CD4 terminal effector     | CD45+ CD3+ CD14- CD66b- CD20- CD56- TCRgd- CD4+ CD8- CCR7- CD45RA+       |
| 13    | Tregs                     | CD45+ CD3+ CD14- CD66b- CD20- CD56- TCRgd- CD4+ CD8- CD25+ CD127-        |
| 14    | Th1-like                  | CD45+ CD3+ CD14- CD66b- CD20- CD56- TCRgd- CD4+ CD8- CXCR5- CXCR3+ CCR6- |
| 15    | Th2-like                  | CD45+ CD3+ CD14- CD66b- CD20- CD56- TCRgd- CD4+ CD8- CXCR5- CXCR3- CCR6- |
| 16    | Th17-like                 | CD45+ CD3+ CD14- CD66b- CD20- CD56- TCRgd- CD4+ CD8- CXCR5- CXCR3- CCR6+ |
| 17    | γδ T cells                | CD45+ CD3+ CD14- CD20- TCRgd+                                            |
| 18    | B cells                   | CD45+ CD3- CD14- CD16- CD161- CD19+ CD20+                                |
| 19    | B naïve                   | CD45+ CD3- CD14- CD16- CD161- CD19+ CD20+ CD27- IgD+                     |
| 20    | B memory                  | CD45+ CD3- CD14- CD16- CD161- CD19+ CD20+ CD27+ IgD-                     |
| 21    | NK cells                  | CD45+ CD3- CD14- CD19- CD20- CD123- CD56+                                |
| 22    | Activated NK cells        | CD45+ CD3- CD14- CD19- CD20- CD123- CD56+ CD69+                          |
| 23    | CD56 <sup>bright</sup> NK | CD45+ CD3- CD14- CD19- CD20- CD123- CD56++ CD16-                         |
| 24    | CD56 <sup>dim</sup> NK    | CD45+ CD3- CD14- CD19- CD20- CD123- CD56+ CD16+                          |
| 25    | Classical monocytes       | CD45+ CD3- CD19- CD20- CD56- CD66b-CD14+ CD16-                           |
| 26    | Transitional monocytes    | CD45+ CD3- CD19- CD20- CD56- CD66b-CD14+ CD16+                           |
| 27    | Non-classical monocytes   | CD45+ CD3- CD19- CD20- CD56- CD66b-CD14- CD16+                           |
| 28    | DCs                       | CD45+ CD3- CD19- CD20- CD56- HLADR+ CD16-                                |
| 29    | mDCs                      | CD45+ CD3- CD19- CD20- CD56- HLADR+ CD16- CD123- CD11c+                  |
| 30    | pDCs                      | CD45+ CD3- CD19- CD20- CD56- HLADR+ CD16- CD123+ CD11c-                  |
| 31    | Granulocytes              | CD45+ CD3- CD66b+                                                        |
| 32    | Neutrophils               | CD45+ CD3- CD19- CD20- CD56- HLADR- CD16+ CD66b+                         |
| 33    | MDSC                      | CD45+ CD3- CD19- CD20- CD56- CD11b+ CD33+ HLADR-/lo                      |
| 34    | M-MDSC                    | CD45+ CD3- CD19- CD20- CD56- CD11b+ CD33+ HLADR-/lo CD14+ CD66b-         |
| 35    | G-MDSC                    | CD45+ CD3- CD19- CD20- CD56- CD11b+ CD33+ HLADR-/lo CD14- CD66b+         |

**Supplemental Table 7. Top 15 up- and downregulated genes after 7 days of ibrutinib therapy in MDSC from all patients and patients according to clinical response.**

| C1D1 vs C1D-7 MDSC           |            |           |                              |            |           |                              |            |           |
|------------------------------|------------|-----------|------------------------------|------------|-----------|------------------------------|------------|-----------|
| All Patients                 |            |           | Clinical Benefit             |            |           | Progressive Disease          |            |           |
| Upregulated with Ibrutinib   |            |           | Upregulated with Ibrutinib   |            |           | Upregulated with Ibrutinib   |            |           |
| Gene                         | avg_log2FC | p_val_adj | Gene                         | avg_log2FC | p_val_adj | Gene                         | avg_log2FC | p_val_adj |
| S100A9                       | 271.96     | 3.60E-27  | S100A8                       | 404.99     | 2.39E-20  | S100A9                       | 271.69     | 4.77E-23  |
| S100A12                      | 98.84      | 7.22E-07  | S100A9                       | 125.11     | 2.00E-02  | TMSB10                       | 115.69     | 2.30E-14  |
| MT-CO3                       | 83.82      | 8.91E-06  | S100A12                      | 120.78     | 4.07E-07  | S100A12                      | 98.57      | 1.60E-04  |
| MT-CO1                       | 65.66      | 1.27E-05  | TMSB10                       | 86.61      | 6.80E-05  | MT-CO1                       | 88.47      | 1.22E-14  |
| MT-CYB                       | 51.05      | 1.66E-02  | GNLY                         | 68.83      | 1.15E-12  | ACTG1                        | 75.46      | 3.94E-11  |
| RPS23                        | 32.92      | 4.58E-02  | ACTB                         | 61.81      | 1.24E-11  | RPL39                        | 73.58      | 2.06E-101 |
| NCF1                         | 32.43      | 1.53E-03  | B2M                          | 61.18      | 1.05E-07  | RPS27                        | 66.82      | 3.61E-66  |
| IFITM2                       | 29.56      | 2.11E-19  | LGALS1                       | 53.32      | 7.66E-12  | RPLP1                        | 62.32      | 2.14E-58  |
| HMG2                         | 28.81      | 7.40E-07  | NCF1                         | 39.97      | 6.86E-14  | RPL41                        | 50.86      | 1.38E-33  |
| RPL11                        | 25.04      | 1.65E-32  | S100A6                       | 35.64      | 5.82E-19  | RPS28                        | 49.51      | 1.07E-89  |
| RPL12                        | 18.16      | 1.74E-21  | RETN                         | 22.12      | 4.72E-06  | RPL30                        | 37.97      | 2.96E-94  |
| RPL30                        | 18.05      | 2.17E-33  | CCL3                         | 14.52      | 2.38E-30  | RPS23                        | 33.64      | 1.08E-30  |
| RPLP1                        | 16.61      | 5.13E-05  | VCAN                         | 14.09      | 1.71E-05  | RPS18                        | 33.61      | 1.58E-23  |
| RPS7                         | 16.61      | 1.82E-09  | IL32                         | 12.58      | 7.33E-09  | RPS12                        | 30.94      | 1.60E-48  |
| LGALS2                       | 16.60      | 2.99E-81  | CCL4                         | 12.55      | 3.38E-06  | IFITM2                       | 29.29      | 1.39E-04  |
| Downregulated with Ibrutinib |            |           | Downregulated with Ibrutinib |            |           | Downregulated with Ibrutinib |            |           |
| Gene                         | avg_log2FC | p_val_adj | Gene                         | avg_log2FC | p_val_adj | Gene                         | avg_log2FC | p_val_adj |
| FTH1                         | -309.44    | 0.00E+00  | RPS27                        | -140.35    | 0.00E+00  | MALAT1                       | -347.23    | 4.69E-11  |
| MALAT1                       | -140.65    | 2.12E-16  | RPL39                        | -104.09    | 2.03E-16  | FTH1                         | -309.72    | 2.97E-292 |
| TIMP1                        | -114.23    | 2.47E-110 | RPL13                        | -98.51     | 4.00E-02  | TIMP1                        | -127.86    | 8.84E-200 |
| B2M                          | -88.71     | 2.24E-25  | RPL41                        | -88.4      | 1.19E-28  | GNLY                         | -88.79     | 5.04E-23  |
| EEF1A1                       | -82.94     | 1.22E-07  | RPL32                        | -76.84     | 2.00E-02  | CCL2                         | -66.55     | 1.26E-137 |
| RPL10                        | -80.05     | 7.90E-28  | RPS28                        | -69.66     | 2.86E-21  | EEF1A1                       | -65.9      | 3.41E-29  |
| RPS27                        | -77.17     | 1.07E-06  | RPS21                        | -65.32     | 1.74E-20  | CCL7                         | -61.57     | 2.26E-115 |
| FABP5                        | -61.30     | 3.05E-14  | RPL37                        | -64.08     | 8.39E-11  | RPL13                        | -60.13     | 9.51E-31  |
| AREG                         | -60.15     | 9.67E-45  | RPLP1                        | -59.56     | 4.68E-09  | CTSL                         | -58.7      | 8.05E-298 |
| RPS12                        | -59.67     | 3.55E-10  | RPL7A                        | -59.46     | 4.00E-02  | LYZ                          | -58.51     | 1.49E-20  |
| RPS15A                       | -58.84     | 4.45E-17  | FTL                          | -55.23     | 2.03E-17  | VIM                          | -55.65     | 1.87E-32  |
| SRGN                         | -55.32     | 3.28E-194 | RPL34                        | -53.76     | 3.00E-02  | G0S2                         | -54.36     | 0.00E+00  |
| G0S2                         | -54.20     | 0.00E+00  | RPL18                        | -52.62     | 2.15E-06  | SRGN                         | -50.59     | 2.92E-214 |
| RPL34                        | -49.69     | 3.99E-24  | RPL8                         | -49.76     | 2.00E-02  | CXCL2                        | -48.07     | 1.80E-49  |
| GNLY                         | -46.87     | 9.94E-05  | RPS15                        | -48.02     | 3.50E-11  | IL32                         | -44.05     | 1.78E-11  |

**Supplemental Table 8. Top 15 up- and downregulated genes after 7 days of ibrutinib therapy in CD8<sup>+</sup> effector T cells from all patients and patients according to clinical response.**

| C1D1 vs C1D-7 CD8 Effector T cells |            |           |                              |            |           |                              |            |           |
|------------------------------------|------------|-----------|------------------------------|------------|-----------|------------------------------|------------|-----------|
| All Patients                       |            |           | Clinical Benefit             |            |           | Progressive Disease          |            |           |
| Upregulated with Ibrutinib         |            |           | Upregulated with Ibrutinib   |            |           | Upregulated with Ibrutinib   |            |           |
| Gene                               | avg_log2FC | p_val_adj | Gene                         | avg_log2FC | p_val_adj | Gene                         | avg_log2FC | p_val_adj |
| MALAT1                             | 167.91     | 5.44E-03  | CCL4                         | 129.11     | 7.46E-03  | MALAT1                       | 193.58     | 4.50E-07  |
| ACTB                               | 47.98      | 1.98E-33  | ACTB                         | 50.66      | 1.47E-50  | VIM                          | 78.25      | 8.40E-13  |
| RPL38                              | 43.76      | 9.37E-03  | RPL38                        | 47.98      | 2.86E-15  | TMSB4X                       | 53.62      | 1.07E-05  |
| ACTG1                              | 41.95      | 3.49E-15  | ACTG1                        | 26.87      | 1.82E-16  | RPS2                         | 39.03      | 4.51E-17  |
| CCL5                               | 41.60      | 1.17E-26  | TMSB10                       | 17.84      | 3.03E-23  | RPL13                        | 30.56      | 8.28E-04  |
| RPS2                               | 39.31      | 2.86E-36  | PFN1                         | 15.23      | 1.58E-43  | ANXA1                        | 30.55      | 5.76E-07  |
| LTB                                | 36.63      | 8.50E-03  | RPS29                        | 9.46       | 1.19E-12  | RPL41                        | 26.23      | 1.92E-02  |
| RPL32                              | 27.95      | 1.93E-04  | RPL27A                       | 8.61       | 8.29E-03  | EEF1A1                       | 20.46      | 1.20E-03  |
| RPL13                              | 27.79      | 2.94E-09  | TRDV3                        | 8.22       | 1.08E-17  | IL32                         | 19.99      | 1.98E-13  |
| IL32                               | 20.30      | 4.27E-18  | MIF                          | 8.06       | 3.43E-15  | RPS15                        | 14.24      | 3.15E-02  |
| OASL                               | 17.96      | 3.15E-02  | CCL5                         | 8.03       | 6.07E-52  | TXNIP                        | 14.22      | 1.34E-09  |
| VIM                                | 17.87      | 1.59E-02  | ATP5F1E                      | 7.85       | 9.70E-11  | MT-ND2                       | 13.61      | 1.61E-03  |
| RPL29                              | 12.45      | 3.83E-05  | GADD45B                      | 7.69       | 3.54E-02  | RACK1                        | 13.00      | 4.78E-02  |
| BTG1                               | 12.12      | 4.22E-03  | TUBA1B                       | 7.05       | 2.85E-10  | LTB                          | 11.80      | 6.24E-04  |
| TXNIP                              | 11.88      | 8.27E-92  | TRDV1                        | 6.24       | 4.72E-04  | JUN                          | 10.18      | 1.44E-08  |
| Downregulated with Ibrutinib       |            |           | Downregulated with Ibrutinib |            |           | Downregulated with Ibrutinib |            |           |
| Gene                               | avg_log2FC | p_val_adj | Gene                         | avg_log2FC | p_val_adj | Gene                         | avg_log2FC | p_val_adj |
| GNLY                               | -368.77    | 2.03E-11  | MT-CO3                       | -234.18    | 1.21E-20  | GNLY                         | -89.18     | 7.66E-33  |
| RPS26                              | -228.82    | 2.55E-50  | RPS26                        | -228.40    | 1.03E-05  | MT-CO2                       | -58.44     | 6.97E-40  |
| MT-CO3                             | -228.79    | 1.51E-28  | MT-CO2                       | -199.55    | 1.02E-02  | MT-CO1                       | -53.09     | 7.90E-12  |
| MT-CO2                             | -176.44    | 4.33E-42  | FTH1                         | -128.68    | 1.15E-33  | B2M                          | -41.57     | 5.10E-13  |
| RPL11                              | -136.50    | 9.35E-05  | RPL12                        | -123.09    | 1.65E-02  | MT-CYB                       | -39.68     | 5.33E-41  |
| RPL12                              | -97.54     | 1.22E-06  | B2M                          | -85.57     | 1.61E-50  | MT-CO3                       | -34.12     | 1.69E-05  |
| RPL8                               | -93.17     | 1.74E-08  | RPS18                        | -84.57     | 4.22E-06  | CCL3                         | -25.76     | 2.77E-04  |
| RPL28                              | -81.67     | 4.96E-02  | PTMA                         | -55.19     | 6.07E-22  | JUNB                         | -24.26     | 4.78E-32  |
| MT-CYB                             | -75.90     | 3.03E-32  | MT-ATP8                      | -43.74     | 2.95E-18  | S100A4                       | -21.37     | 6.49E-40  |
| HLA-B                              | -61.90     | 2.16E-24  | HLA-A                        | -37.96     | 6.44E-04  | HLA-DRB1                     | -21.37     | 6.06E-06  |
| MT-ND1                             | -49.06     | 2.50E-10  | LMNA                         | -32.00     | 3.21E-13  | RPS26                        | -18.58     | 5.60E-34  |
| MT-ATP8                            | -44.16     | 3.29E-29  | LEPROTL1                     | -26.80     | 7.30E-24  | CD74                         | -18.49     | 9.67E-04  |
| RPS12                              | -44.16     | 2.71E-02  | AHNAK                        | -25.11     | 7.49E-07  | CRIP1                        | -18.30     | 1.07E-06  |
| B2M                                | -41.27     | 9.62E-14  | MT2A                         | -23.09     | 1.28E-04  | HLA-C                        | -17.16     | 4.08E-72  |
| PTMA                               | -32.62     | 6.14E-27  | CD74                         | -23.09     | 6.02E-02  | FGFBP2                       | -15.33     | 7.73E-09  |
